# Supplementary material for: Hybrid Vitis Cultivars with American or Asian Ancestries Show Higher Tolerance towards Grapevine Trunk Diseases
Source: MDPI journal article supplement (doi:10.3390/plants12122328), 2023-06-15
Supplement: s1 [file s1]

**Table S1.** Parents of the surveyed interspecific *Vitis* cultivars.

| Cultivar name in the germplasm collection    | Parent 1                                  | Parent 2                                     |
|----------------------------------------------|-------------------------------------------|----------------------------------------------|
| Interspecific cultivars with American origin |                                           |                                              |
| Aletta                                       | Muscat Ottonel                            | Villard Blanc                                |
| Angela                                       | Villard Blanc                             | Halili Krasznuey                             |
| Aron                                         | Villard Blanc                             | Perlette                                     |
| Baco-1                                       | Folle Blanche                             | Riparia Grand Glabre + <i>V. riparia</i>     |
| Bianca                                       | Villard Blanc                             | Bouvier                                      |
| Concord                                      | Catawba                                   | <i>Vitis labrusca</i>                        |
| Couderc                                      | Munson                                    | Raisaine                                     |
| Csillam                                      | Rayon D'or                                | Blaufraenkisch                               |
| Dalmadin                                     | Catawba                                   | <i>V. labrusca</i>                           |
| Duna Gyongye                                 | Seibel 4986 X Csaba gyoengye              | SEIBEL 4986 + ?                              |
| Elvira                                       | Taylor                                    | Martha                                       |
| Esther                                       | Villard Blanc                             | Magaracsi csemege                            |
| Eureka                                       | America                                   | Ontario                                      |
| Fanny                                        | Villard Blanc                             | Parent 2 was not confirmed                   |
| Fehér Delaware                               | <i>V. labrusca</i>                        | <i>Vitis vinifera</i> subsp. <i>vinifera</i> |
| Fenyeselevelu Izabella                       | <i>V. labrusca</i>                        | Meslier Petit                                |
| Flora                                        | <i>V. vinifera</i> subsp. <i>vinifera</i> | <i>V. labrusca</i>                           |
| GM. 318-57                                   | Chancellor                                | Riesling                                     |
| GM. 7116-26                                  | Geisenheim 323-58                         | Ehrenfelser                                  |
| GM. 7743-15                                  | Riesling                                  | Geisenheim 6495- 1                           |
| Gocseji zamatos                              | Seyve Villard 12- 286                     | Medoc Noir                                   |
| Hibernal (GM. 322-58)                        | Seibel 7053 + Riesling                    | ?                                            |
| Jazmin                                       | Bianca                                    | Petra                                        |
| Kék Izabella                                 | <i>V. labrusca</i>                        | Meslier Petit                                |
| Lakhegyi mezes                               | Honigler                                  | Villard Blanc                                |
| Lidi                                         | Villard Blanc                             | Magaracsi csemege                            |
| Lilla                                        | Villard Blanc                             | Pannonia kincse x Mathiasz Janos diadala     |
| Medina                                       | Seyve Villard 12- 286                     | Medoc Noir                                   |
| Moldova                                      | Guzal Kara                                | Villard Blanc                                |
| Nero                                         | Villard Blanc                             | Gardonyi Geza                                |
| Othello                                      | Munson                                    | <i>V. vinifera</i> subsp. <i>vinifera</i>    |
| Palatina                                     | Koenigin der Weingaerten                  | Villard Blanc                                |
| Piros Delaware                               | Labrusca x aestivalis                     | <i>V. vinifera</i>                           |
| Poloskei muskotaly                           | Zala gyoengye                             | Erzsebet kiralyne emleke                     |
| Reflex                                       | Pannonia kincse                           | Aurore                                       |
| Reform                                       | Csaba gyoengye                            | Aurore                                       |
| Refren                                       | Gloria Hungariae                          | Aurore                                       |
| Regent                                       | Diana                                     | Chambourcin                                  |
| RF 16                                        | Gloria Hungariae                          | Aurore                                       |
| RF-38/32                                     | Seibel 5279                               | <i>V. vinifera</i>                           |
| Seibel 1                                     | Munson                                    | <i>V. vinifera</i> subsp. <i>vinifera</i>    |
| Seibel 11803 (Rubilande)                     | Biennu                                    | Roi des Noirs                                |
| Seibel 13053 (Cascade)                       | Seibel 7042                               | Seibel 5409                                  |
| Seibel 2                                     | Munson                                    | <i>V. vinifera</i> subsp. <i>vinifera</i>    |
| Seibel 4643 (Roi des Noirs)                  | Seibel 29                                 | Dangue                                       |
| Seibel 4646 (Pourpre)                        | Seibel 2508                               | Seibel 880                                   |
| Seibel 4986 (Rayon D'or)                     | Seibel 405                                | Seibel 2007                                  |
| Seibel 5409 (Glorie de Seibel)               | Seibel 867                                | Seibel 452                                   |

|                                                                   |                                                                                        |                                          |
|-------------------------------------------------------------------|----------------------------------------------------------------------------------------|------------------------------------------|
| Seibel 5450                                                       | Seibel 867                                                                             | Seibel 4182                              |
| Seibel 5455 (Plantet)                                             | Seibel 867                                                                             | Seibel 2524                              |
| Seibel 7053 (Chancellor)                                          | Seibel 5163                                                                            | Seibel 880                               |
| Seibel 8718                                                       | Seibel 5163                                                                            | Seibel 880                               |
| Seibel 8745 (Seinoir)                                             | Seibel 5163                                                                            | Seibel 880                               |
| Seyve Villard 12286                                               | Subereux                                                                               | Seibel 6468                              |
| Seyve Villard 12303                                               | Subereux                                                                               | Seibel 6468                              |
| Seyve Villard 12358                                               | Subereux                                                                               | Seibel 6468                              |
| Seyve Villard 12364                                               | Subereux                                                                               | Seibel 6468                              |
| Seyve Villard 12375 (Villard Blanc)                               | Subereux                                                                               | Seibel 6468                              |
| Seyve Villard 12390                                               | Subereux                                                                               | Seibel 6468                              |
| Seyve Villard 18315 (Villard Noir)                                | Chancellor                                                                             | Subereux                                 |
| Seyve Villard 20365 (Dattier de St. Vallier)                      | Muscat Hamburg                                                                         | Villard Blanc                            |
| Seyve Villard 20473 (Muscat de St. Vallier Blanc)                 | Seyve Villard 12129                                                                    | Muscat Hamburg                           |
| Seyve Villard 23657 (Varousset)                                   | Seibel 4668                                                                            | Subereux                                 |
| Seyve Villard 5276 (Seyval Blanc)                                 | Seibel 5656                                                                            | Rayon D'or                               |
| Suzy                                                              | Villard Blanc                                                                          | Pannonia kincse                          |
| Terez                                                             | Villard Blanc                                                                          | Olimpia                                  |
| Zala gyoengye                                                     | Roucaneuf                                                                              | Csaba gyoengye                           |
| Interspecific cultivars with Asian ( <i>V. amurensis</i> ) origin |                                                                                        |                                          |
| A 15-10/1                                                         |                                                                                        |                                          |
| A 15-11-6                                                         |                                                                                        |                                          |
| A 15-13/4                                                         |                                                                                        |                                          |
| A 15-7-1                                                          |                                                                                        |                                          |
| A 15-8/3                                                          |                                                                                        |                                          |
| A 5-10-6                                                          |                                                                                        |                                          |
| A 5-11/2                                                          | <i>Vitis amurensis</i> ancestor. Pers. com. Dr. Pál Kozma breeder.<br>kozma.pal@pte.hu |                                          |
| A 5-11/6                                                          |                                                                                        |                                          |
| A 5-14/5                                                          |                                                                                        |                                          |
| A 5-1-5                                                           |                                                                                        |                                          |
| A 5-16-3                                                          |                                                                                        |                                          |
| A 5-18-4                                                          |                                                                                        |                                          |
| A 5-21/1                                                          |                                                                                        |                                          |
| A 5-23/5                                                          |                                                                                        |                                          |
| A 5-4-6                                                           |                                                                                        |                                          |
| Alfold-100                                                        | Thalloczy Lajos                                                                        | <i>V. amurensis</i> x <i>V. vinifera</i> |
| Amadeus                                                           | Chardonnay                                                                             | <i>V. amurensis</i> x <i>V. vinifera</i> |
| Bruszkam                                                          | Bruskovatenkii                                                                         | <i>V. amurensis</i>                      |
| Kaberam                                                           | Cabernet Sauvignon                                                                     | <i>V. amurensis</i>                      |
| Korai bibor                                                       | <i>V. amurensis</i> x <i>V. vinifera</i>                                               | Irsai Oliver                             |
| Kunbarat                                                          | Koleda 28/19                                                                           | Afus Ali                                 |
| Kunleany                                                          | Koleda 28/19                                                                           | Afus Ali                                 |
| Odysseus                                                          | ( <i>V. amurensis</i> x <i>V. vinifera</i> ) X<br>Thalloczy Lajos Muskotaly            | Pinot Gris                               |
| Orpheus                                                           | <i>V. amurensis</i> x <i>V. vinifera</i>                                               | Irsai Oliver                             |
| Pannon frankos                                                    | ( <i>V. amurensis</i> X <i>V. vinifera</i> ) F2                                        | Irsai Oliver                             |
| SK 77/11/87                                                       | Kunleany                                                                               | Traminer                                 |
| Panonija (SK 90-2/19)                                             | Sremski Karlovci 86 2-239                                                              | Riesling                                 |
| SK 77-10/53                                                       | Welshriesling                                                                          | Kunbarat                                 |
| SK 77-10/54 (Lela)                                                | Welshriesling                                                                          | Kunbarat                                 |

---

|                    |                        |                                          |
|--------------------|------------------------|------------------------------------------|
| SK 77-14/17 (Mila) | Kunleany               | Muscat Ottonel                           |
| SK 77-2/10         | Kunleany               | Traminer                                 |
| SK 77-3/16         | Saperavi Severny       | Blaufraenkisch                           |
| SK 77-3/9          | Saperavi Severny       | Blaufraenkisch                           |
| SK 77-4/4          | Kunbarat               | Traminer                                 |
| SK 77-4/5          | Kunbarat               | Traminer                                 |
| Vosztorg           | Zarya Severa x Dolores | Ruskii Rannii                            |
| Zarya Severa       | Seyanets Malengra      | <i>V. amurensis</i> x <i>V. vinifera</i> |

---
